# Supplementary material
Source: PubMed Central journal article supplement (PMC9827722)
Supplement: NIHMS1849067-supplement-33965189_DennisHickstein_SuppleFigs.pdf [file NIHMS1849067-supplement-33965189_DennisHickstein_SuppleFigs.pdf]

| Age sex        | GATA2-MonoMAC disease <sup>#</sup> /<br>Cutaneous warts | Protocol*<br>Donor Product<br>PTCy <sup>†</sup> | NK cells<br>/μl | B cells<br>/μl | Monocytes<br>k/μl | CD4+<br>Tcells/μl | CD8+<br>Tcells/μl | Transplant<br>outcome                                 |
|----------------|---------------------------------------------------------|-------------------------------------------------|-----------------|----------------|-------------------|-------------------|-------------------|-------------------------------------------------------|
| 38.<br>45 F    | RCMD-<br>Mycobacterial<br>disease/no                    | 1<br>MRD<br>PBSC                                | 0               | 5              | 30                | 40                | 27                | Alive 9y5m                                            |
| 39.<br>33<br>M | RCMD-<br>Mycobacterial<br>disease/yes                   | 1<br>URD<br>PBSC                                | 16              | 3              | 100               | 441               | 283               | Alive 10y5m                                           |
| 40.<br>23 F    | RCMD-<br>mycobacterial<br>disease/no                    | 1<br>URD<br>PBSC                                | 14              | 7              | 260               | 315               | 542               | Alive 9y10m                                           |
| 41.<br>33<br>M | RCMD/no                                                 | 1<br>URD<br>PBSC                                | 10              | 18             | 10                | 309               | 288               | Died 1 yr, 6m<br>Failed 2 <sup>nd</sup><br>transplant |
| 42.<br>15<br>M | RCMD-<br>mycobacterial<br>disease/yes                   | 1<br>UCB                                        | 6               | 0              | 10                | 126               | 152               | Alive 9y8m                                            |
| 43.<br>22 F    | CMML/no                                                 | 1<br>HRD<br>BM                                  | 146             | 0              | 460               | 644               | 1330              | Died D1                                               |
| 44.<br>21 F    | MonoMAC-<br>mycobacterial<br>disease/no                 | 1<br>HRD<br>BM                                  | 6               | 2              | 220               | 122               | 1918              | Alive 6y11m                                           |
| 45.<br>24<br>M | MDS-<br>mycobacterial<br>disease/yes                    | 2<br>MRD<br>PBSC                                | 1               | 0              | 30                | 149               | 142               | Alive 7y3m                                            |
| 46.<br>17<br>M | MDS/no                                                  | 2<br>URD<br>PBSC                                | 8               | 15             | 50                | 322               | 323               | Died d745 GVHD                                        |
| 47.<br>25 F    | AML/no                                                  | 2<br>URD<br>PBSC                                | 0               | 0              | 30                | 28                | 14                | Died d160 Relapsed<br>AML                             |
| 48.<br>18<br>M | MDS/yes                                                 | 2<br>URD<br>BM                                  | 5               | 8              | 10                | 128               | 470               | Alive 4y8m                                            |
| 49.<br>21<br>M | MDS/yes                                                 | 2<br>URD<br>BM                                  | 0               | 16             | 20                | 354               | 405               | Alive 4y6m                                            |
| 50.<br>25<br>M | MonoMAC-<br>AML/yes                                     | 2<br>URD<br>PBSC                                | 51              | 2              | 680               | 221               | 245               | Alive 4y5m                                            |
| 51.<br>33<br>M | MDS/yes                                                 | 2<br>URD<br>BM                                  | 1               | 24             | 10                | 322               | 259               | Alive 4y4m                                            |

|                |                                       |                          |     |    |     |      |      |                             |
|----------------|---------------------------------------|--------------------------|-----|----|-----|------|------|-----------------------------|
| 52.<br>18 F    | MDS/no                                | 2<br>URD<br>BM           | 19  | 0  | 0   | 369  | 208  | Alive 3y7m                  |
| 53.<br>30<br>M | MDS/yes                               | 2<br>URD<br>PBSC         | 69  | 32 | 100 | 705  | 700  | Alive 3y4m                  |
| 54.<br>45 F    | MDS/yes                               | 2<br>HRD<br>BM<br>PTCy   | 1   | 41 | 10  | 171  | 391  | Alive 6y2m                  |
| 55.<br>16 F    | MDS-<br>mycobacterial<br>disease/no   | 2<br>HRD<br>BM<br>PTCy   | 36  | 10 | 10  | 216  | 174  | Alive 4y3m                  |
| 56.<br>39 F    | MDS-<br>mycobacterial<br>disease/no   | 2<br>HRD<br>PBSC<br>PTCy | 42  | 5  | 20  | 292  | 117  | Alive 1y4m,<br>relapse 1y4m |
| 57.<br>42 F    | BMID-<br>mycobacterial<br>disease/no  | 2<br>HRD<br>BM<br>PTCy   | 30  | 2  | 0   | 114  | 111  | Alive 1y1m                  |
| 58.<br>24 F    | MDS/yes                               | 2<br>MRD<br>BM<br>PTCy   | 5   | 57 | 10  | 395  | 286  | Alive 3y11m                 |
| 59.<br>25 F    | BMID-<br>mycobacterial<br>disease/no  | 2<br>HRD<br>BM<br>PTCy   | 0   | 1  | 1   | 361  | 284  | Alive 1y5m                  |
| 60.<br>15<br>M | BMID/yes                              | 2<br>MRD<br>BM<br>PTCy   | 10  | 58 | 2   | 529  | 865  | Alive 1y3m                  |
| 61.<br>15<br>M | CMML/yes                              | 2<br>HRD<br>PBSC<br>PTCy | 30  | 13 | 4   | 2105 | 2221 | Alive 1y4m                  |
| 62.<br>22 F    | BMID-<br>mycobacterial<br>disease/yes | 2<br>HRD<br>BM<br>PTCy   | 0   | 8  | 27  | 465  | 308  | Alive 1y6m                  |
| 63.<br>13<br>M | BMID/yes                              | 2<br>URD<br>BM<br>PTCy   | 10  | 22 | 11  | 166  | 321  | Alive 1y9m                  |
| 64.<br>52 F    | MonoMAC-<br>MDS/no                    | 2<br>URD<br>PBSC<br>PTCy | 117 | 85 | 0   | 654  | 908  | Died 1y6m<br>GVHD           |

|                |                                              |                          |     |    |     |      |      |                                                                |
|----------------|----------------------------------------------|--------------------------|-----|----|-----|------|------|----------------------------------------------------------------|
| 65.<br>37<br>M | MDS/yes                                      | 2<br>MMUD<br>BM<br>PTCy  | 73  | 23 | 10  | 151  | 276  | Alive 2y5m                                                     |
| 66.<br>18 F    | MDS/yes                                      | 2<br>MRD<br>BM<br>PTCy   | 550 | 75 | 77  | 951  | 857  | Alive 2y8m                                                     |
| 67.<br>23<br>M | MDS/yes                                      | 2<br>URD<br>BM<br>PTCy   | 10  | 6  | 6   | 277  | 257  | Alive 2y9m                                                     |
| 68.<br>20 F    | BMID-probable<br>mycobacterial<br>disease/no | 2<br>MRD<br>BM<br>PTCy   | 20  | 14 | 10  | 483  | 371  | Alive 2y9m                                                     |
| 69.<br>18<br>M | BMID/no                                      | 2<br>HRD<br>BM<br>PTCy   | 20  | 40 | 46  | 1020 | 749  | Alive 3y2m                                                     |
| 70.<br>20 F    | MDS/yes                                      | 2<br>HRD<br>BM<br>PTCy   | 20  | 10 | 27  | 367  | 596  | Alive 3y4m                                                     |
| 71.<br>30<br>M | MDS/yes                                      | 2<br>MUD<br>PBSC<br>PTCy | 72  | 0  | 390 | 38   | 270  | Alive 3m                                                       |
| 72.<br>18 F    | MDS/no                                       | 2<br>MUD<br>BM<br>PTCy   | 5   | 60 | 70  | 1060 | 1407 | Alive 4m                                                       |
| 73.<br>36 F    | MDS/yes                                      | 2<br>MUD<br>PBSC<br>PTCy | 130 | 45 | 80  | 1674 | 1110 | Alive 6 m                                                      |
| 74.<br>22 F    | BMID/yes                                     | 2<br>HRD<br>PBSC<br>PTCy | 3   | 20 | 132 | 417  | 4    | Secondary graft<br>failure 2 <sup>nd</sup> tx<br>d145 Alive 7m |
| 75.<br>19 F    | BMID/yes                                     | 2<br>MUD<br>BM<br>PTCy   | 5   | 71 | 120 | 989  | 1284 | Alive 8m                                                       |

\*Protocol 1, Reduced Intensity Conditioning, Protocol 2, myeloablative busulfan-based conditioning

† PTCy: post transplant cyclophosphamide

#RCMD: Refractory Cytopenia with multilineage dysplasia, RAEB: Refractory Anemia with Excess Blasts, BMID: Bone Marrow disorder with immune deficiency, AML: Acute myeloid leukemia, CMML: chronic myelomonocytic leukemia

MUD: Matched unrelated Donor, MRD: Matched related donor, UC: umbilical cord blood, HRD: haplo-identical related donor. MMUD: Mismatched (9/10) unrelated donor  
BM: bone marrow, PBSC: peripheral blood stem cells

Supplementary Table 1. GATA2 deficient HCT recipients without historical or prevalent HPV anogenital disease

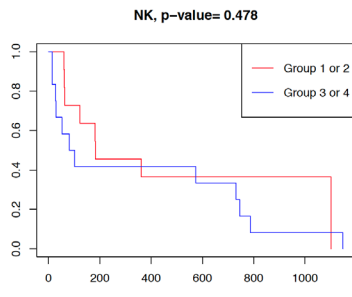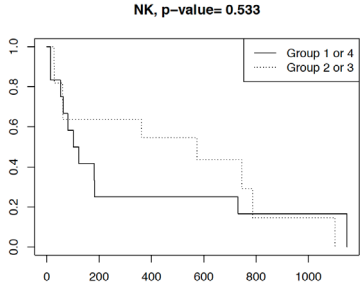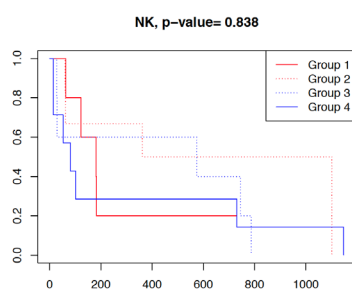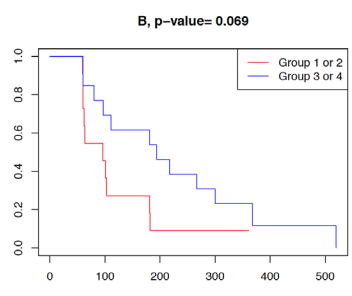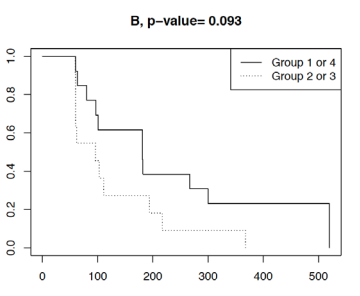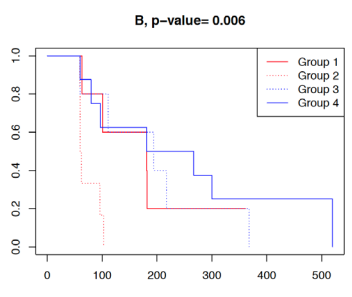

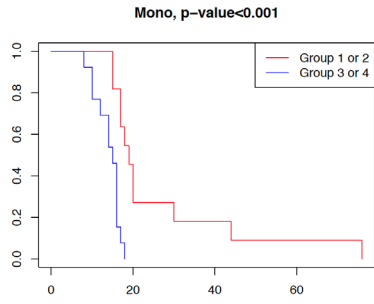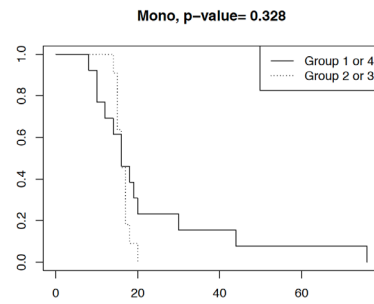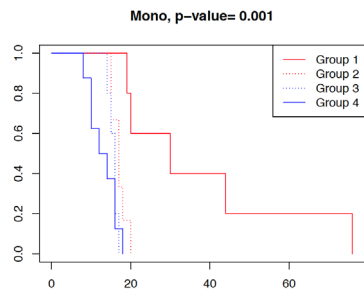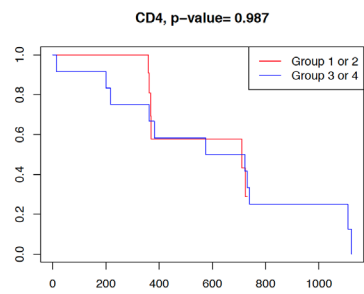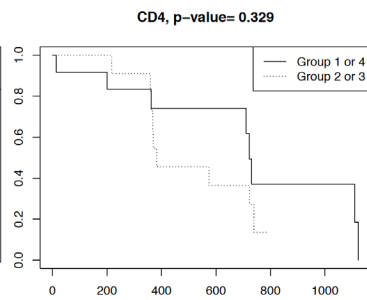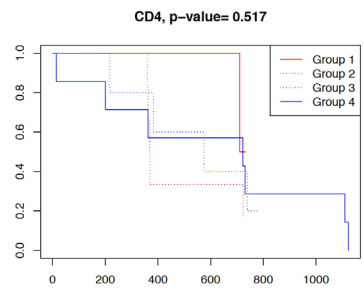

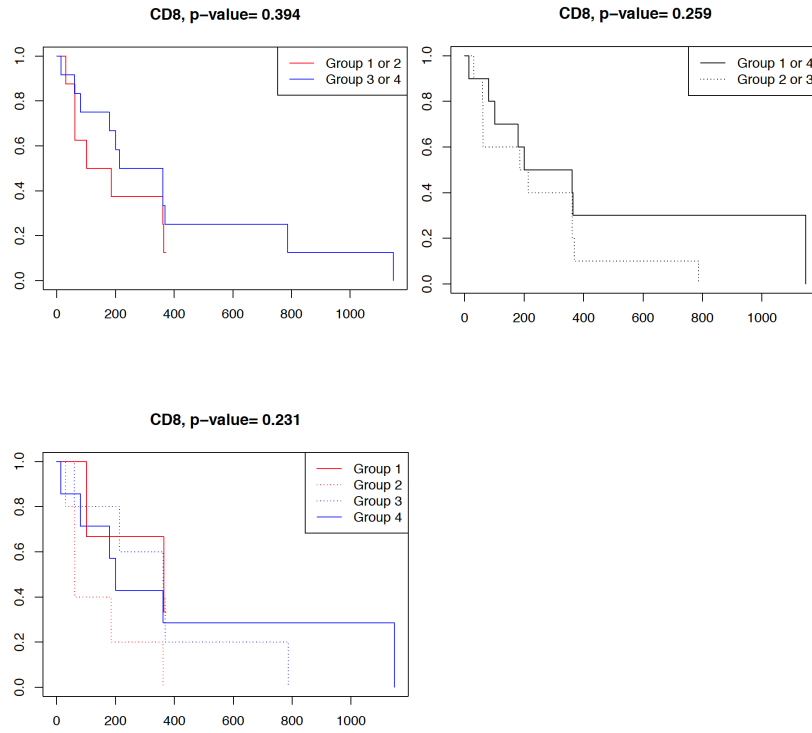

Supplementary Figure 1. Cellular reconstitution per day post-transplant by immunological subset, immunosuppression (per protocol [PP] or intensified/prolonged [IP] immunosuppression) and relation to group of HPV outcome: Group 1, persistent HPV disease with IP; Group 2, persistent HPV disease (PP); Group 3, resolved HPV disease (PP); Group 4, resolved HPV disease (IP).

| Age sex<br>Duration<br>HPV<br>disease | GATA2 or<br>MonoMAC<br>Bone marrow<br>disease | Protocol<br>Donor<br>Product | NK<br>cells/<br>μl | B<br>cells/<br>μl | Mono-<br>cytes<br>k/μl | CD4+<br>Tcells/μl | CD8+<br>Tcells/<br>μl | Transplant<br>outcome                                                             |
|---------------------------------------|-----------------------------------------------|------------------------------|--------------------|-------------------|------------------------|-------------------|-----------------------|-----------------------------------------------------------------------------------|
| 2.<br>27 F<br>4 yr                    | MonoMAC<br>AML**                              | 1<br>MUD<br>PBSC             | 62                 | 27                | 80                     | 412               | 479                   | Died d 123<br>srGVHD<br>liver/GI                                                  |
| 4.<br>49 F<br>unk                     | RCMD                                          | 1<br>MRD<br>PBSC             | 2                  | 3                 | 0                      | 140               | 86                    | Died d 88<br>sepsis/GVHD                                                          |
| 8.<br>28 M<br>unk                     | RCMD                                          | 1<br>Double<br>UCB           | 0                  | 1                 | 40                     | 154               | 78                    | Died 1 year,<br>sepsis                                                            |
| 9.<br>26 F<br>unk                     | RCMD                                          | 1<br>Double<br>UCB           | 4                  | 12                | 20                     | 178               | 119                   | Died d 295                                                                        |
| 14.<br>28 F<br>2 years                | MDS                                           | 1<br>MUD<br>BM               | 0                  | 10                | 0                      | 211               | 142                   | Died d 227<br>sepsis                                                              |
| 15.<br>38 F unk                       | MDS                                           | 2<br>MUD<br>PBSC             | 7                  | 21                | 0                      | 509               | 418                   | Lost to<br>follow-up                                                              |
| 16.<br>24 F<br>5 years                | MDS                                           | 2<br>MUD<br>BM<br>PTCy       | 7                  | 11                | 10                     | 487               | 405                   | Died d 125<br>complications<br>of<br>hemorrhagic<br>cystitis                      |
| 25.<br>45M<br>5 years                 | MDS                                           | 2<br>MRD<br>BM<br>PTCy       | 18                 | 2                 | 10                     | 201               | 360                   | No<br>recurrence                                                                  |
| 36.<br>39 F<br>unk                    | MDS                                           | 2<br>MUD<br>BM<br>PTCy       | 54                 | 1                 | 30                     | 130               | 193                   | Alive,<br>secondary<br>graft<br>failure/2 <sup>nd</sup><br>transplant 9<br>months |
| 37.<br>31 F<br>unk                    | BMID                                          | 2<br>MRD<br>BM<br>PTCy       | 5                  | 36                | 0                      | 348               | 588                   | Alive 6<br>months                                                                 |

MRD: matched related donor, MUD: matched unrelated donor, UCB: umbilical cord blood, BM: bone marrow, PBSC: peripheral blood stem cells, GVHD: graft versus host disease, sr: steroid refractory

\*Protocol 1, Reduced Intensity Conditioning, Protocol 2, myeloablative busulfan-based conditioning

† PTCy: post transplant cyclophosphamide

#RCMD: Refractory Cytopenia with multilineage dysplasia, BMID: Bone Marrow disorder with immune deficiency, AML: Acute myeloid leukemia



Supplementary Table 2. Transplant characteristics and outcome for recipients without sufficient follow-up.
